# Supplementary material
Source: Springer Nature journal article supplement (https://www.springermedizin.de/resource/supplementary/13058_2006_1475_MOESM6_ESM.pdf/9699200)

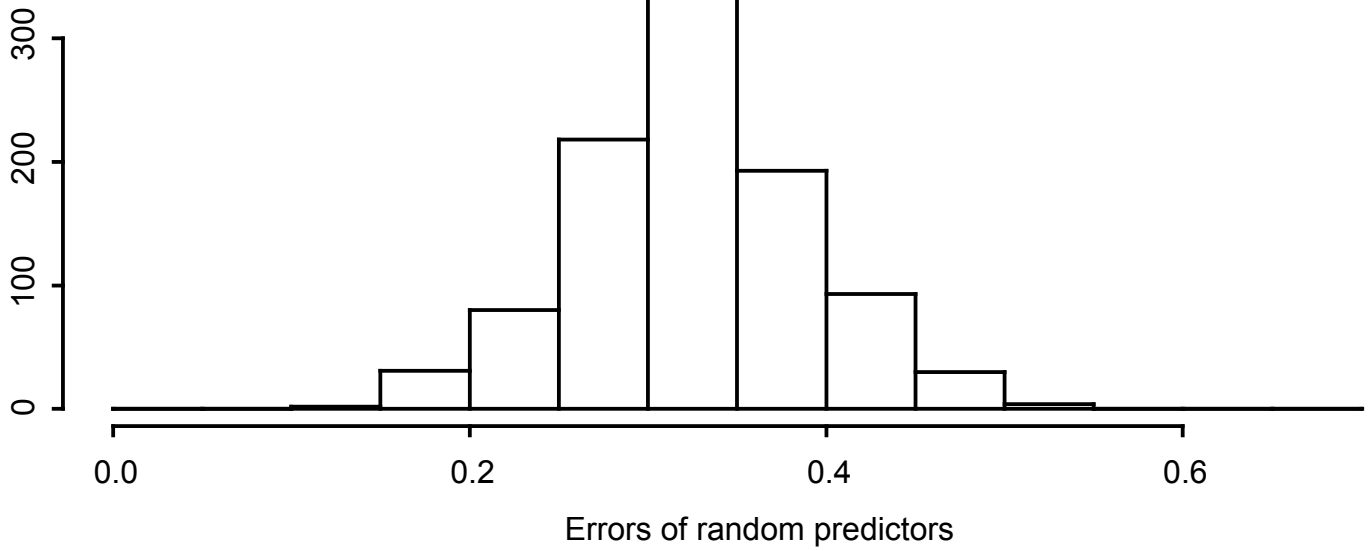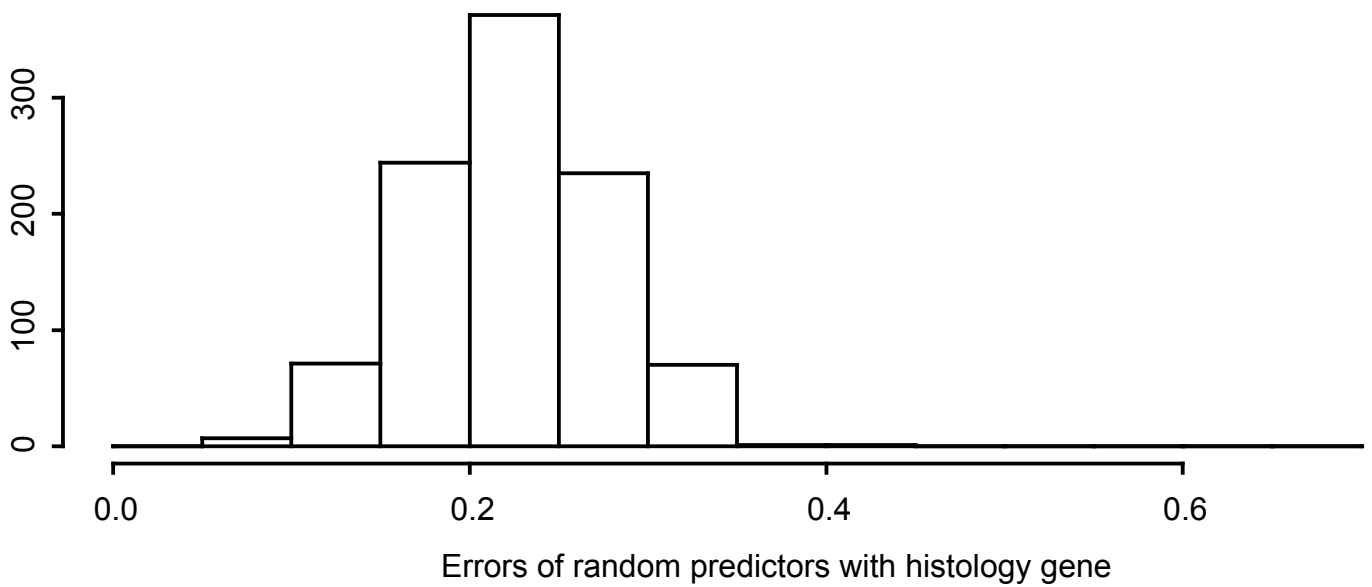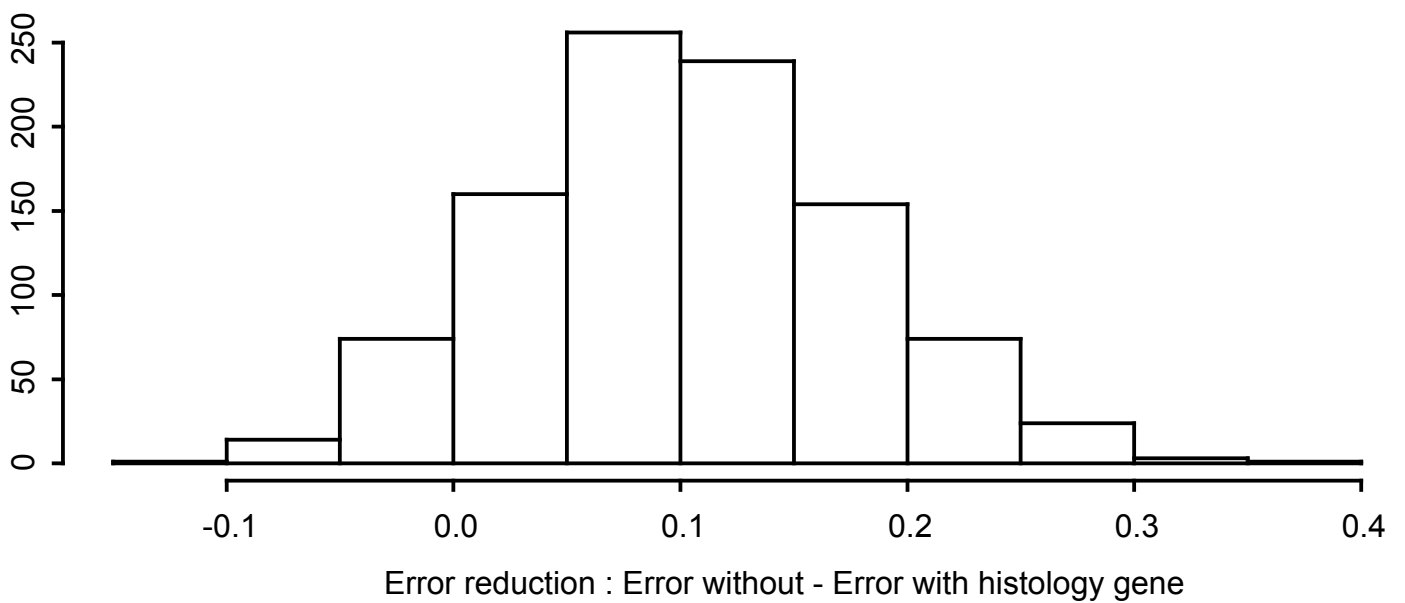

Supplement: MOESM6 [file 9699200]
